# Supplementary material for: Structure of the saxiphilin:saxitoxin (STX) complex reveals a convergent molecular recognition strategy for paralytic toxins
Source: PubMed Central journal article supplement — Sci Adv. 2019 Jun 19;5(6):eaax2650. doi: 10.1126/sciadv.aax2650 (PMC6584486; doi:10.1126/sciadv.aax2650), 2019-06-19
Supplement: aax2650_SM.pdf [file aax2650_SM.pdf]

## Supplementary Materials for

### **Structure of the saxiphilin:saxitoxin (STX) complex reveals a convergent molecular recognition strategy for paralytic toxins**

Tien-Jui Yen, Marco Lolicato, Rhiannon Thomas-Tran, J. Du Bois, Daniel L. Minor Jr.\*

\*Corresponding author. Email: [daniel.minor@ucsf.edu](mailto:daniel.minor@ucsf.edu)

Published 19 June 2019, *Sci. Adv.* **5**, eaax2650 (2019)

DOI: 10.1126/sciadv.aax2650

#### **The PDF file includes:**

Table S1. Crystallographic data collection and refinement statistics.  
Fig. S1. Sxph structural analysis.  
Fig. S2. Sxph sequence, secondary structure, and disulfide map.  
Fig. S3. Comparison of Sxph and representative transferrin family member sequences.  
Fig. S4. Sxph thyroglobulin domain structural analysis.  
Fig. S5. STX-binding site and STX derivatives.  
Fig. S6. Structural comparison of Sxph N1 and C1 domains.  
Fig. S7. Sequence comparison of Sxph and putative Sxph homologs.  
Fig. S8. Na<sub>v</sub>PaS:STX and Na<sub>v</sub>1.7:STX interactions.  
Legend for movie S1  
References (68–71)

#### **Other Supplementary Material for this manuscript includes the following:**

(available at [advances.sciencemag.org/cgi/content/full/5/6/eaax2650/DC1](https://advances.sciencemag.org/cgi/content/full/5/6/eaax2650/DC1))

Movie S1 (.mp4 format). Sxph conformational changes upon STX binding.

**Table S1. Crystallographic data collection and refinement statistics.**

|                               | <b>apo-Saxiphilin</b>                         | <b>Sxph:STX complex (soaked)</b>              | <b>Sxph:STX complex (co-crystal)</b>          |
|-------------------------------|-----------------------------------------------|-----------------------------------------------|-----------------------------------------------|
| <b>Data Collection</b>        |                                               |                                               |                                               |
| Space group                   | P2 <sub>1</sub> 2 <sub>1</sub> 2 <sub>1</sub> | P2 <sub>1</sub> 2 <sub>1</sub> 2 <sub>1</sub> | P2 <sub>1</sub> 2 <sub>1</sub> 2 <sub>1</sub> |
| Unit cell                     |                                               |                                               |                                               |
| a, b, c (Å) <sup>a</sup>      | 96.2, 111.3, 254.8                            | 96.4, 110.8, 254.6                            | 96.6, 111.7, 254.6                            |
| α, β, γ (°)                   | 90, 90, 90                                    | 90, 90, 90                                    | 90, 90, 90                                    |
| Resolution (Å)                | 48.2-2.50 (2.54-2.50)                         | 48.2-2.50 (2.54-2.50)                         | 48.3- 2.12 (2.16-2.12)                        |
| Total reflections             | 1143210                                       | 1155387                                       | 1962129                                       |
| Unique reflections            | 95268                                         | 94650                                         | 156355                                        |
| Completeness (%)              | 99.8 (97.3)                                   | 99.6 (95.2)                                   | 99.9 (98.5)                                   |
| Redundancy                    | 12.0 (6.6)                                    | 12.2 (6.7)                                    | 12.5 (7.4)                                    |
| I/σI                          | 16.0 (1.1)                                    | 14.7 (0.5)                                    | 13.3 (0.3)                                    |
| CC <sub>1/2</sub>             | 1 (0.57)                                      | 1 (0.25)                                      | 1 (0.10)                                      |
| <b>Refinement<sup>b</sup></b> |                                               |                                               |                                               |
| R <sub>work</sub> (%)         | 22.4                                          | 23.7                                          | 23.8                                          |
| R <sub>free</sub> (%)         | 25.3                                          | 26.2                                          | 25.9                                          |
| RMS deviations                |                                               |                                               |                                               |
| Bonds (Å)                     | 0.003                                         | 0.003                                         | 0.002                                         |
| Angles (°)                    | 0.68                                          | 0.76                                          | 0.68                                          |
| Average B factor              | 83.3                                          | 105.0                                         | 94.2                                          |
| Protein                       | 83.6                                          | 105.1                                         | 94.6                                          |
| Water                         | 59.5                                          | 69.7                                          | 69.4                                          |
| Ligand                        | -                                             | 116.1                                         | 95.1                                          |
| Ramachandran [%]              |                                               |                                               |                                               |
| Allowed/generous/disallowed   | 95.2/4.0/0.8                                  | 93.8/5.0/1.2                                  | 95.3/3.6/1.1                                  |

<sup>a</sup> statistics for the highest resolution shell are shown in parentheses.

<sup>b</sup> Final refined models cover all residues except for the following:

**apo-Saxiphilin**

Chain A, 171-178, 289, 571-573, 620, and 637-646

Chain B, 1-4 and 169-178

**Sxph:STX complex (soaked)**

Chain A : 1-3, 172-177, 585-586, 620-621, 637-647, 673-674, 701-711, and 717-718

Chain B: 1-4, 169-179, and 572-573

**Sxph:STX complex (co-crystal)**

Chain A : 1,2, 171-173, 585-586, 620-621, 637-647, 673-674

Chain B: 1-4, 169-178, and 572-573

Fig. S1

Yen *et al.*

A

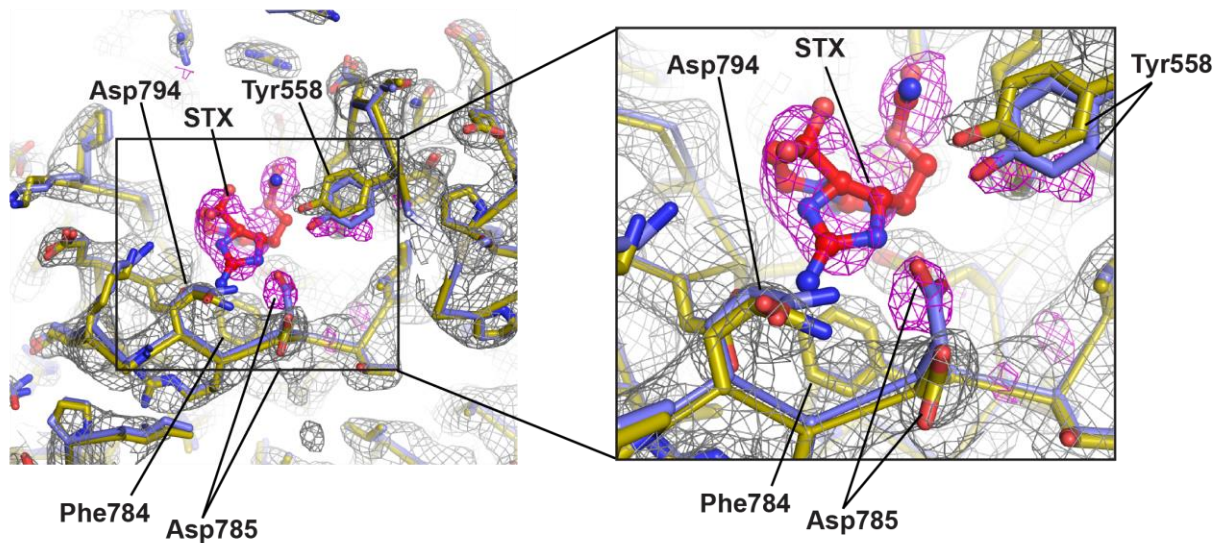

B

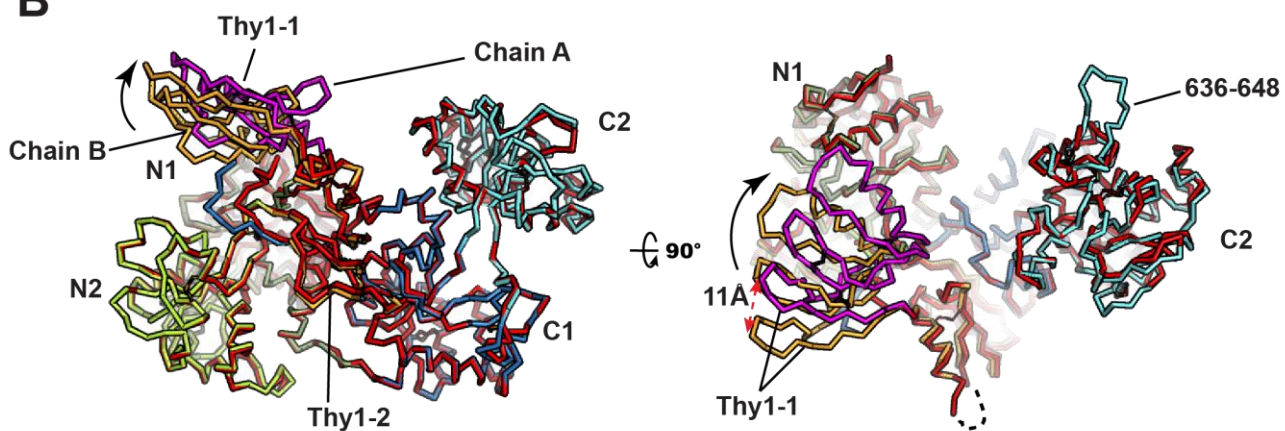

C

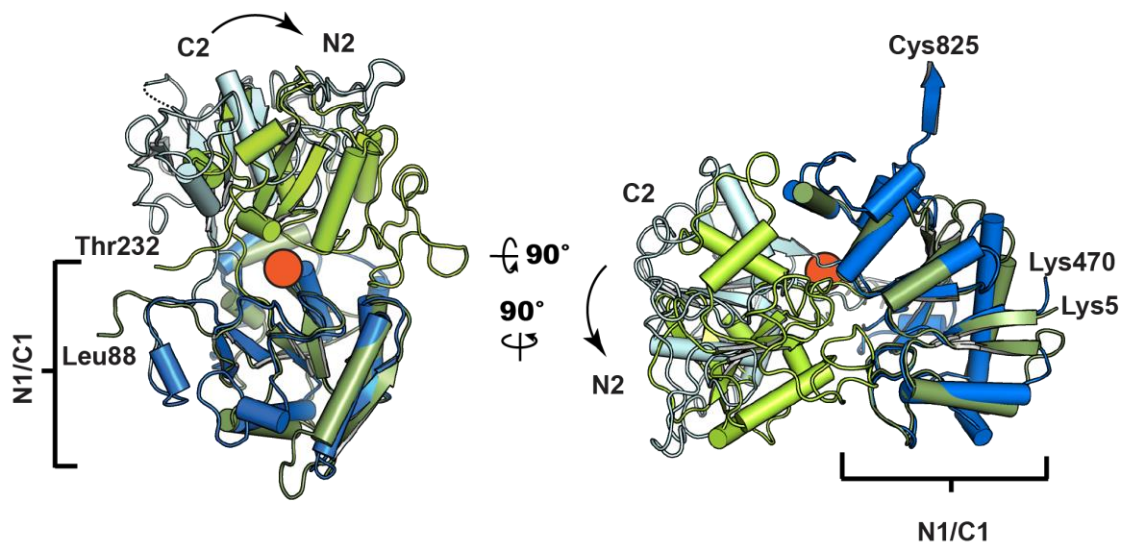

**Fig. S1. Sxph structural analysis.** **(A)** Exemplar 2Fo-Fc electron density ( $1.5\sigma$ )(grey) and Fo-Fo ( $5\sigma$ )(magenta) for Sxph and STX, respectively. Sxph (olive) and Sxph:STX (marine) are shown and select residues are labeled. STX is red. **(B)** Ribbon diagram superposition of apo-Sxph Chain A (red and magenta) and Chain B ( $\text{RMSD}_{\text{C}\alpha} = 0.61 \text{ \AA}$  over 663 residues). Chain A Thy1-1 is colored magenta. Chain B subdomains are colored: N1 (smudge), N2 (Limon), Thy (bright orange), C1 (marine), and C2 (cyan). Relative displacement of the Thy1-1 is indicated. **(C)** Superposition of apo-Sxph N-lobe (N1, smudge; N2, limon) and C-lobe (C1, marine; C2, cyan). Relative motions of N2 and C2 subdomains are indicated. As a point of reference, the orange sphere marks position that corresponds to the transferrin  $\text{Fe}^{3+}$  binding site. The N-lobe and C1 cores have lowest B-factors (average B factor of  $74.0 \text{ \AA}^2$  for N-lobe and  $63.4 \text{ \AA}^2$  for C1 domain), whereas the majority of C2 is more mobile (average B-factor of  $108.4 \text{ \AA}^2$ ).

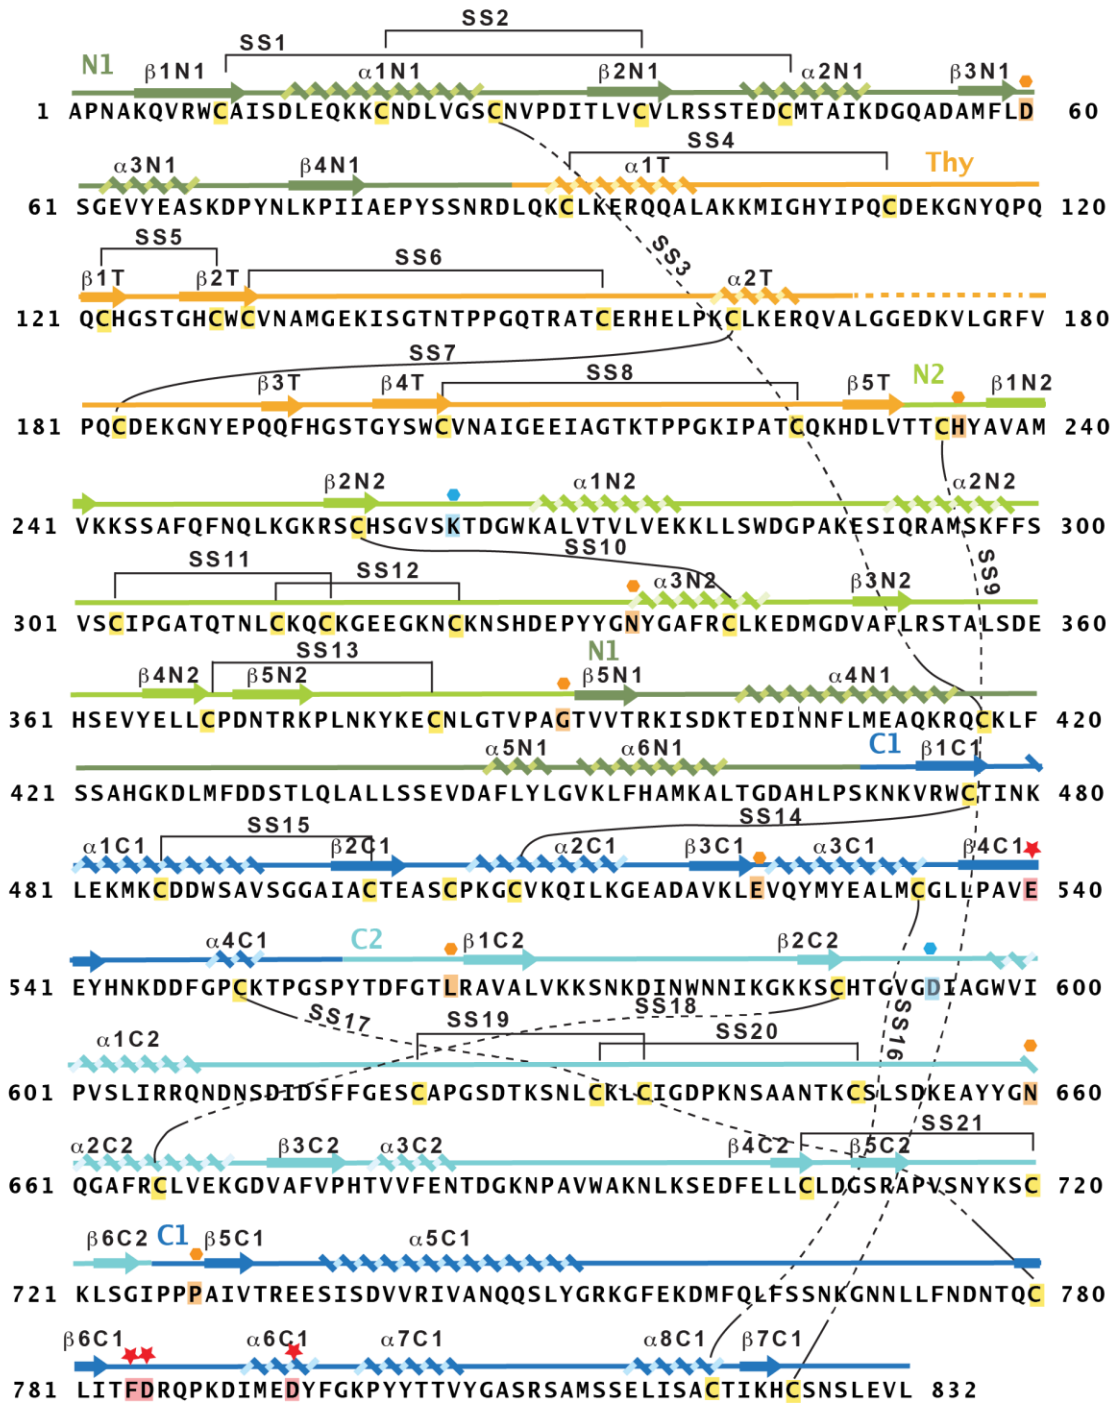

**Fig. S2. Sxph sequence, secondary structure, and disulfide map.** *Rana catesbeiana* Sxph sequence. Secondary structures are indicated. Domains are labeled and colored as in fig. S1A. Cysteine residues (yellow) and disulfide bonds (SS#) are indicated. Residues corresponding to transferrin Fe<sup>3+</sup> and carbonate ligands are indicated by orange and blue hexagons, respectively and highlighted. Residues corresponding to STX-interacting residues are indicated by the red star and are highlighted.



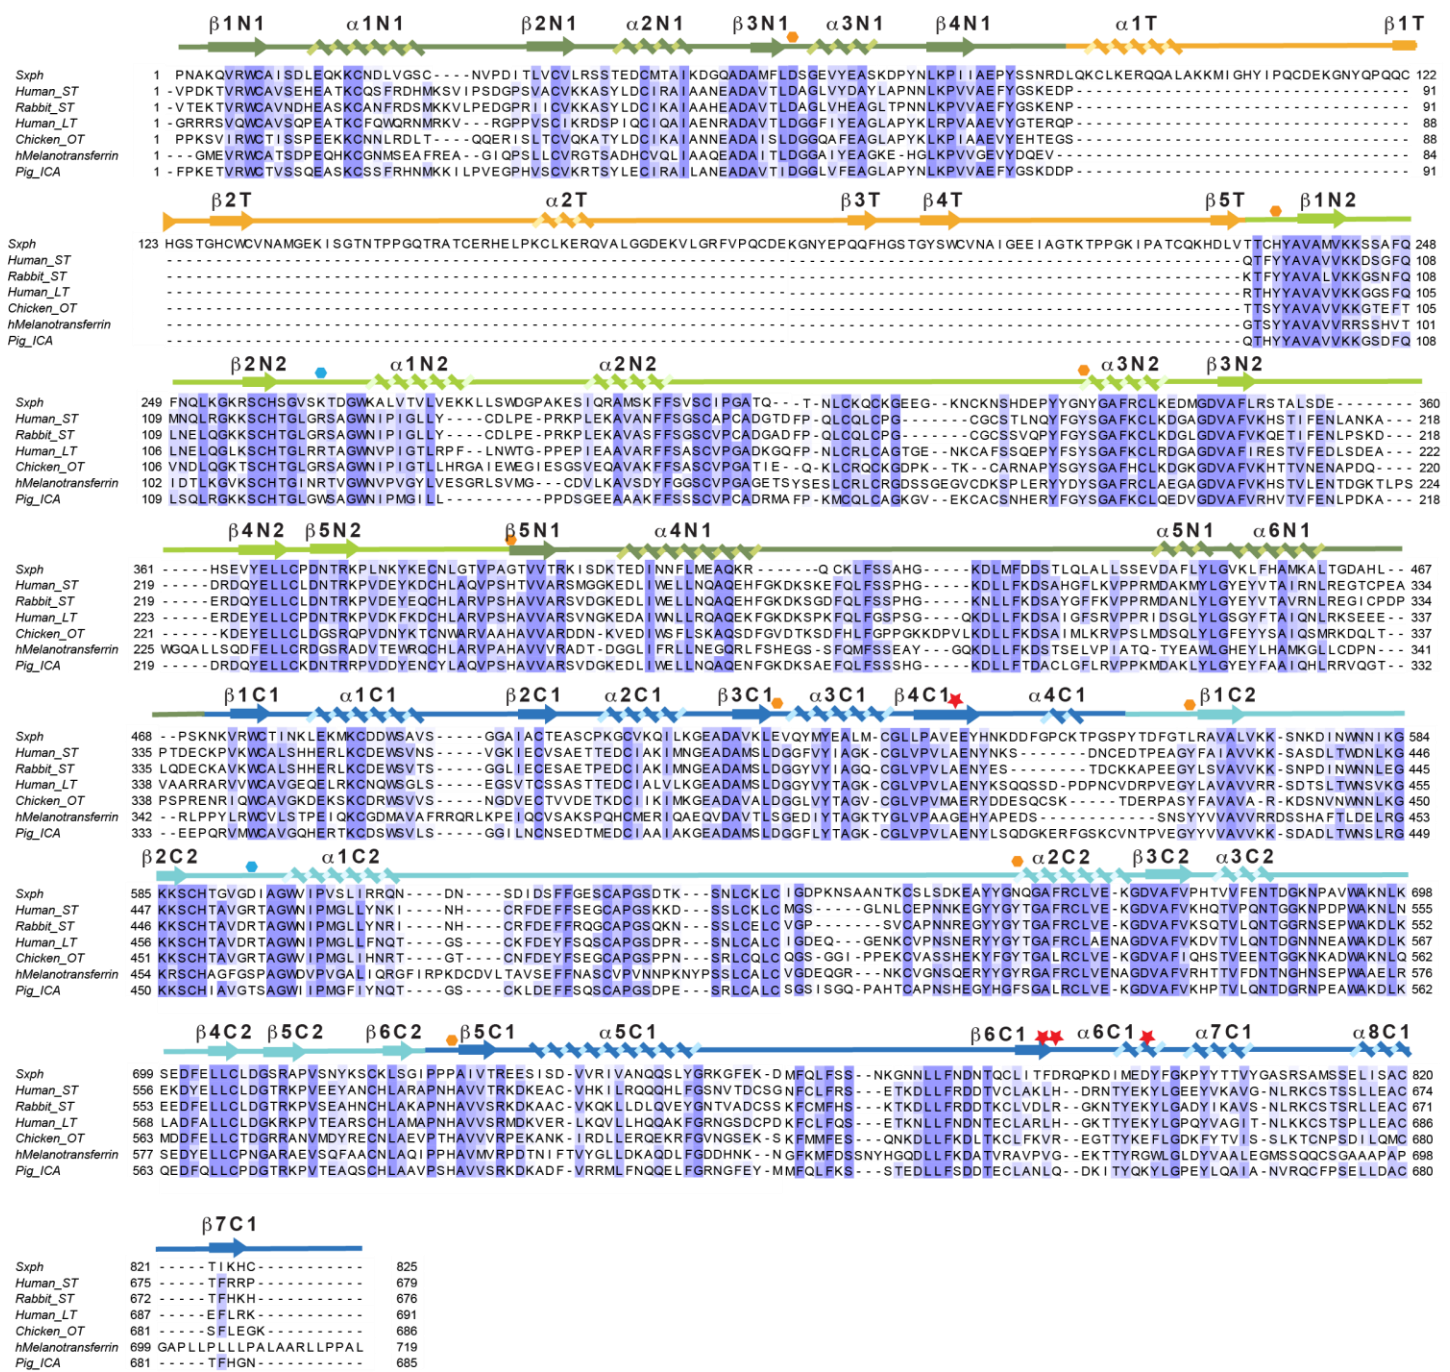

**Fig. S3. Comparison of Sxph and representative transferrin family member sequences.**

Sequence alignment of *Rana catesbeiana* Sxph with representative members of the transferrin family. Human serum transferrin (Human\_ST) (UniProtKB: P02787), rabbit serum transferrin (Rabbit\_ST) (UniProtKB:P19134), human lactotransferrin (Human\_LT) (UniProtKB:P02788), chicken ovotransferrin (Chicken\_OT) (UniProtKB:P02789), human melanotransferrin (Melanotransferrin) (UniProtKB:P08582), and pig inhibitor of carbonic anhydrase (Pig\_ICA) (UniProtKB:Q29545). Sxph

domain and secondary structures are indicated and colored as in fig. S1B. Residues corresponding to transferrin  $\text{Fe}^{3+}$  and carbonate ligands are indicated by orange and blue hexagons, respectively and highlighted (38).



**A**

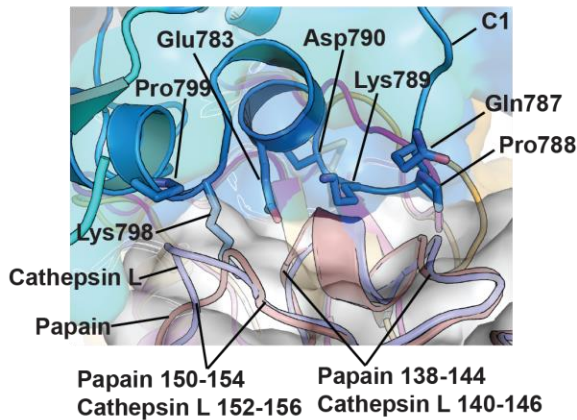

**B**

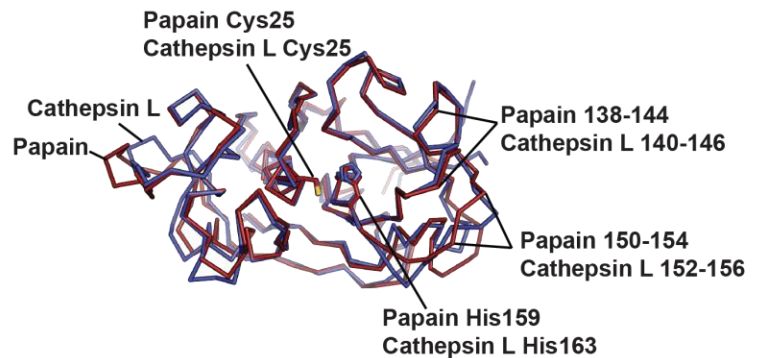

**C**

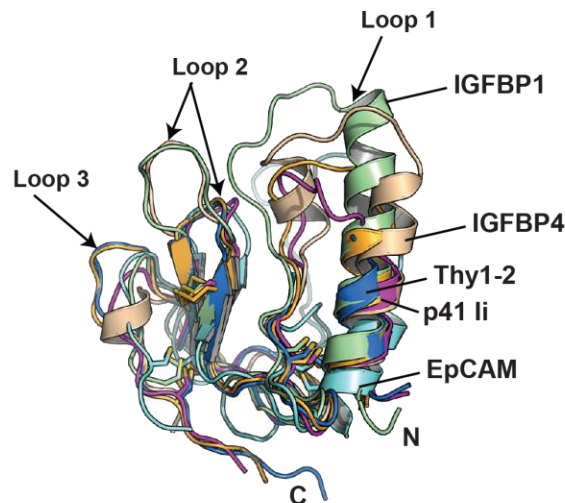

**D**

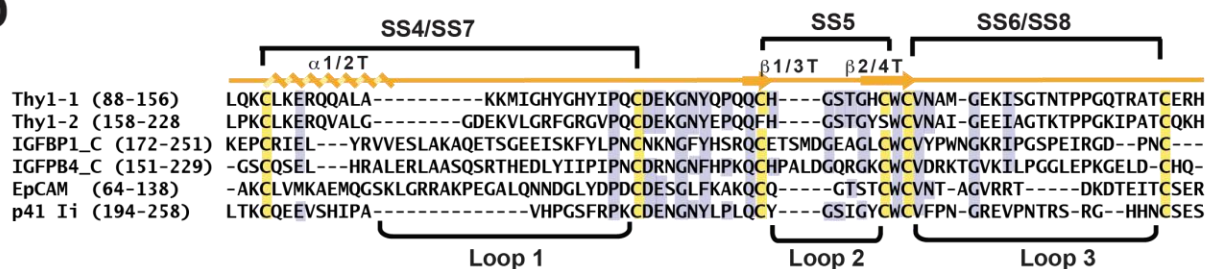

**Fig. S4. Sxph thyroglobulin domain structural analysis.** (A) Close up view of the superposition of the Sxph Thy1-2 domain on the p41 li:cathepsin L complex and papain (PDB: 1POP) (68) on the p41:cathepsin L complex (PDB: 1ICF) (38). Sxph residues that clash with the enzyme surface are labeled. Regions of cathepsin L (light blue) and papain (firebrick) are indicated. (B) Superposition of cathepsin L from the p41 li:cathepsin complex (PDB: 1ICF) (38) and papain (PDB: 1POP) (68).  $RMSD_{C\alpha} = 0.66 \text{ \AA}$  over 168 residues. Active site residues and regions of clash from panel 'A' are indicated and clash with Sxph C1 residues 787-790, 783, and 787-799. (C) Superposition of Thy1

domains from Sxph (Thy1-1, bright orange, Thy1-2, marine), p41 (1ICF, magenta) (38), IGFBP1 (1ZT3, green) (69), IGPBP4 (PDB: 2DSR, wheat)(70), and EpCAM (PDB: 4MZV, aquamarine)(71).  
**(D)** Sequence comparison of Thy1 domains from 'C'. Secondary structure elements and disulfide bond labels are from the Sxph Thy1 domains.

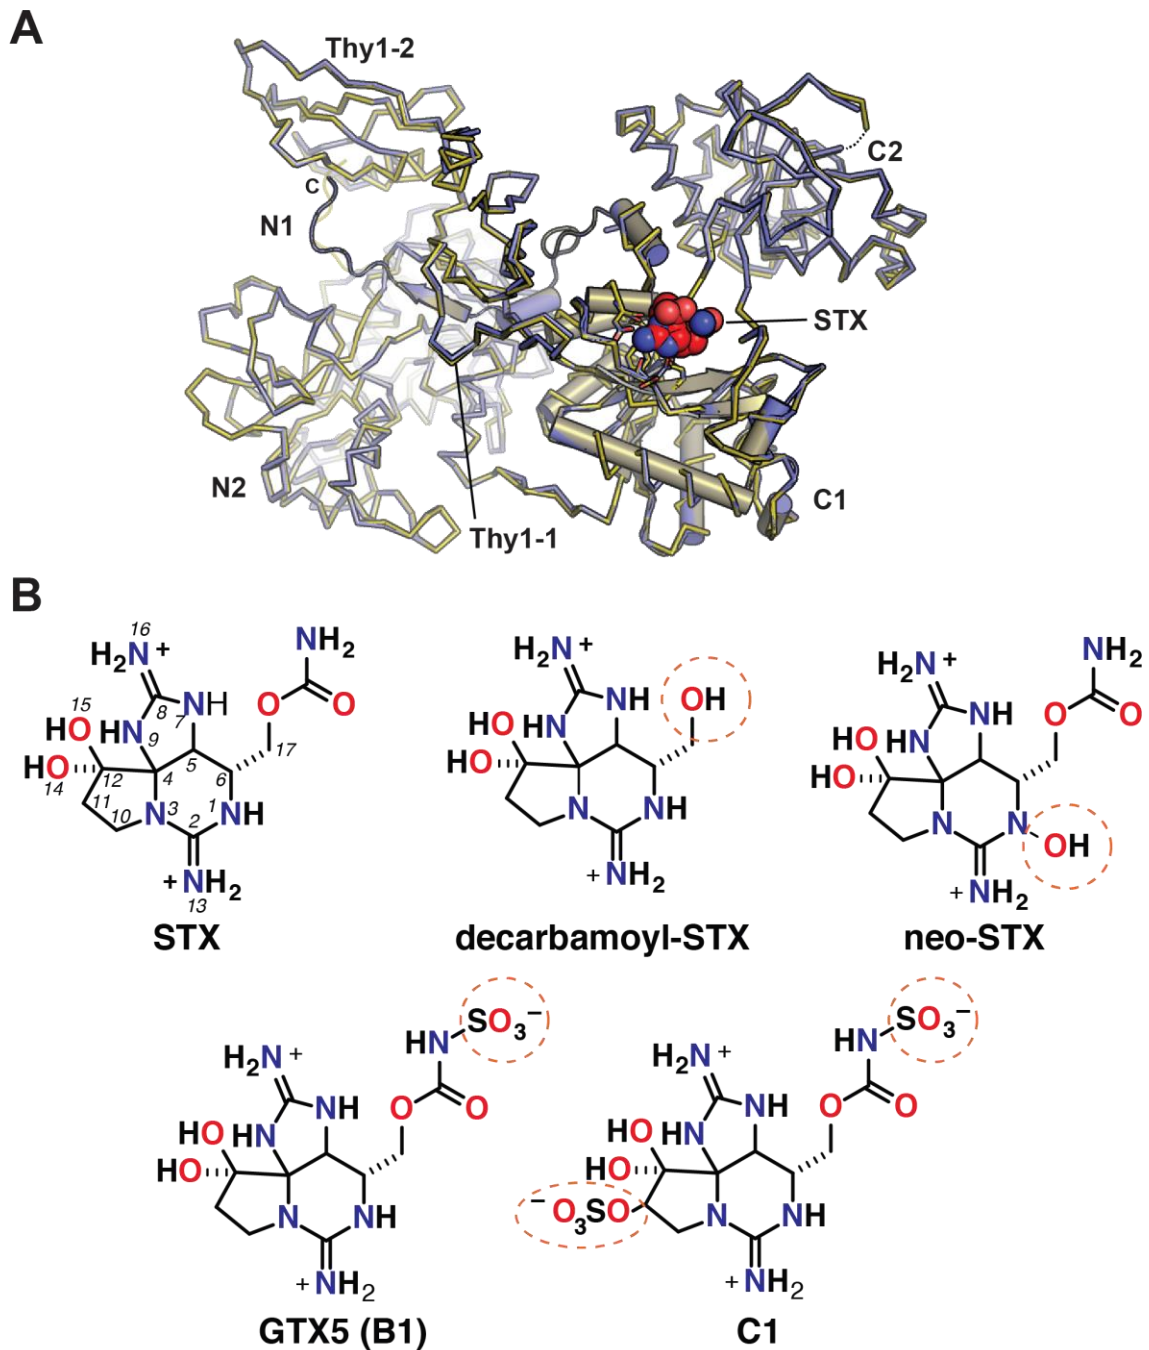

**Fig. S5. STX-binding site and STX derivatives.** (A) Superposition of apo-Sxph (olive) and STX bound STX (slate) shown as ribbons ( $\text{RMSD}_{\text{C}\alpha} = 0.21 \text{ \AA}$  over 671 residues). C1 domain is also shown in cartoon representation. STX (red) is shown as space filling. Residues in the STX binding site are shown as sticks. (B) STX and derivatives. STX atom numbering is shown in italics. Dashed circles indicate sites of modification in STX derivatives. Gonyautoxin 5 is also known as ‘B1’.

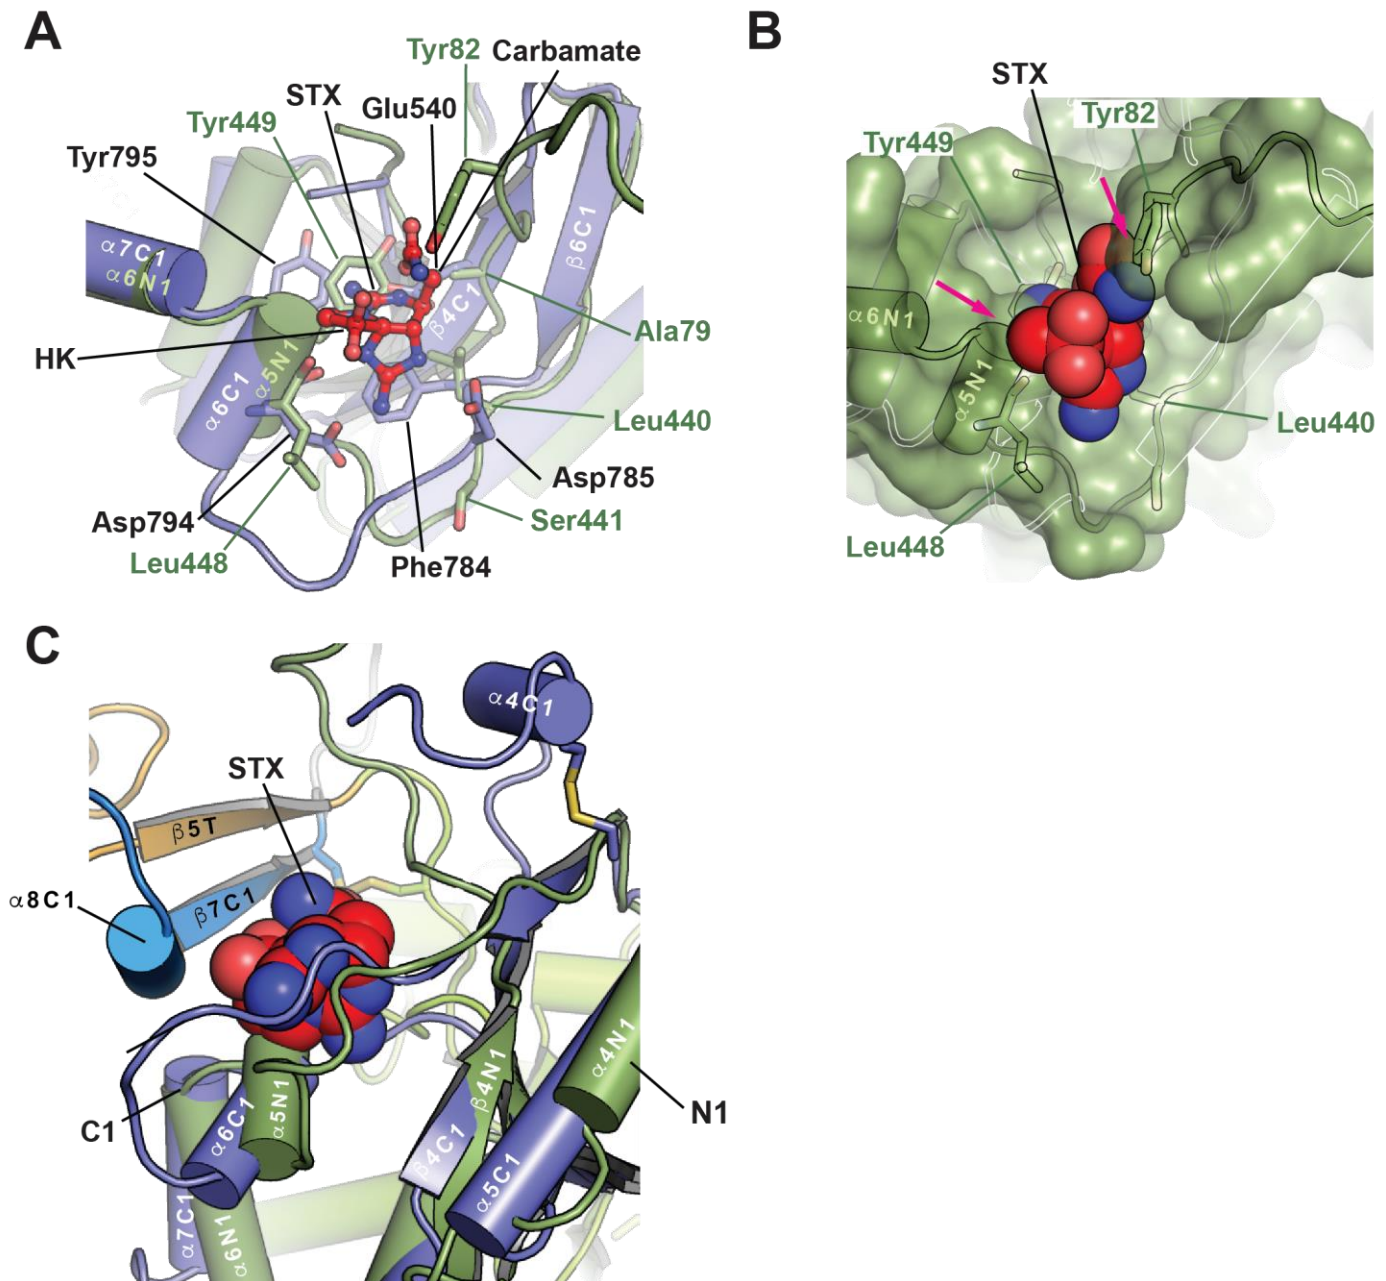

**Fig. S6. Structural comparison of Sxph N1 and C1 domains.** (A) Superposition of the Sxph N1 (green), and C1 (slate) domains ( $RMSD_{C\alpha} = 0.90 \text{ \AA}$  over 86 residues). STX is shown in red. N1 domain residues corresponding to C1 domain STX binding residues are shown as sticks and are labeled. (B) Surface rendering of the Sxph N1 proto-pocket (green). STX is shown in space-filling representation. Magenta arrows indicate clash sites. (C) Superposition Sxph N1 (green), and C1 (slate) domains. Elements from Sxph that occlude the N1 domain proto-pocket are labeled with black letters. STX (red) is shown in space filling representation.





**Fig. S7. Sequence comparison of Sxph and putative Sxph homologs.** Sequence alignment of *Rana catesbeiana* Sxph with putative Sxph homologs from springtail (*Folsomia candida*) (NCBI: OXA56246.1), Nile tilapia (*Oreochromis niloticus*) (NCBI:XP\_019214738.1), Northern pike (*Esox lucius*) (NCBI:XP\_010879337.1), and High Himalaya frog (*Nanorana parkeri*) (NCBI: XP\_018410833.1).





interactions (PDB:6J8G) (47) determined with LIGPLOT (67) a cutoffs of 5.0 Å and 3.35Å, respectively.

**Movie S1. Sxph conformational changes upon STX binding.** Morph between the apo-Sxph and Sxph:STX structures showing the STX binding pocket. Select sidechain and backbone atoms are shown as sticks. STX is shown as red sticks.
